# Supplementary material for: The Biodiversity and Geochemistry of Cryoconite Holes in Queen Maud Land, East Antarctica
Source: PubMed Central journal article supplement (PMC6616603; doi:10.3390/microorganisms7060160), 2019-06-01
Supplement: microorganisms-07-00160-s001.pdf [file microorganisms-07-00160-s001.pdf]

# Supplementary Information

## The Biodiversity and Geochemistry of Cryoconite Holes in Queen Maud Land, East Antarctica

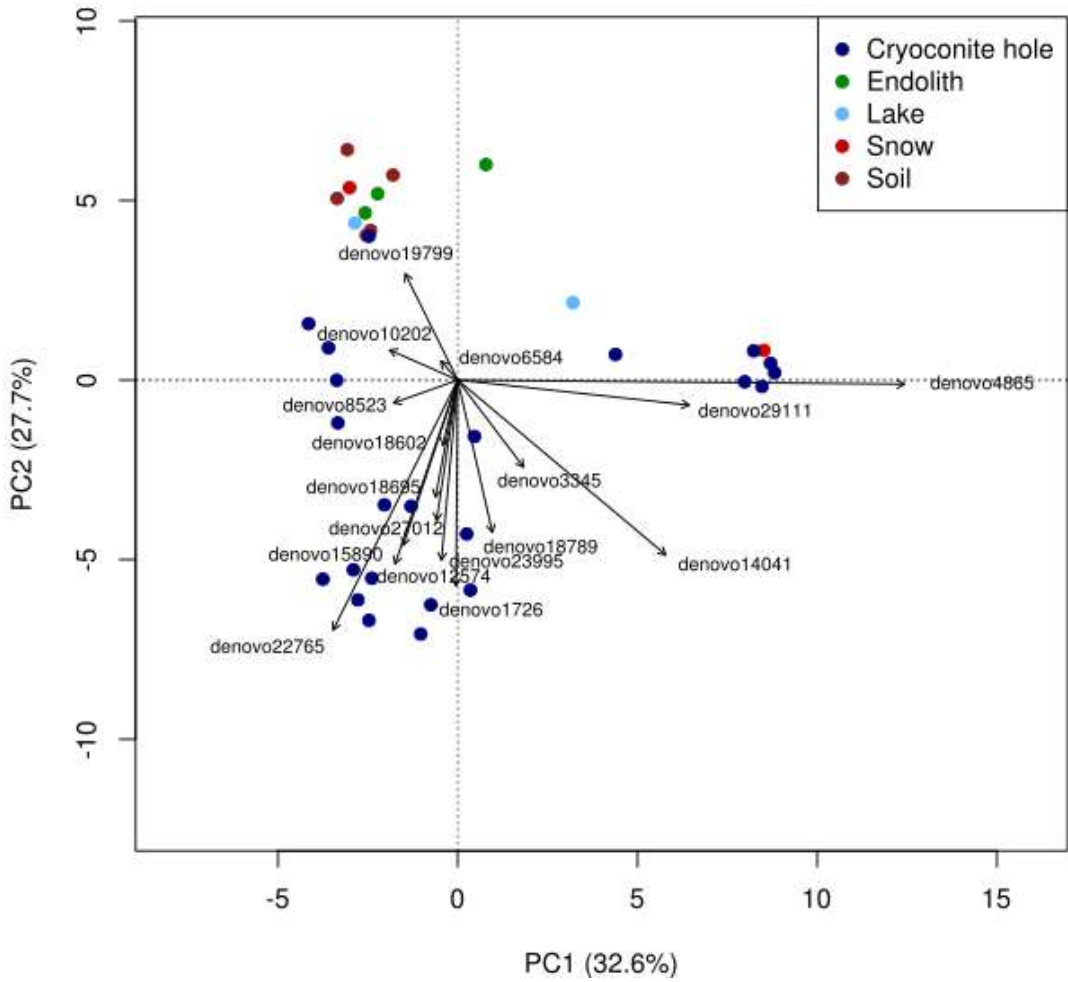

Figure S1. Principal component analysis of the bacterial OTUs. Samples cluster according to habitats.

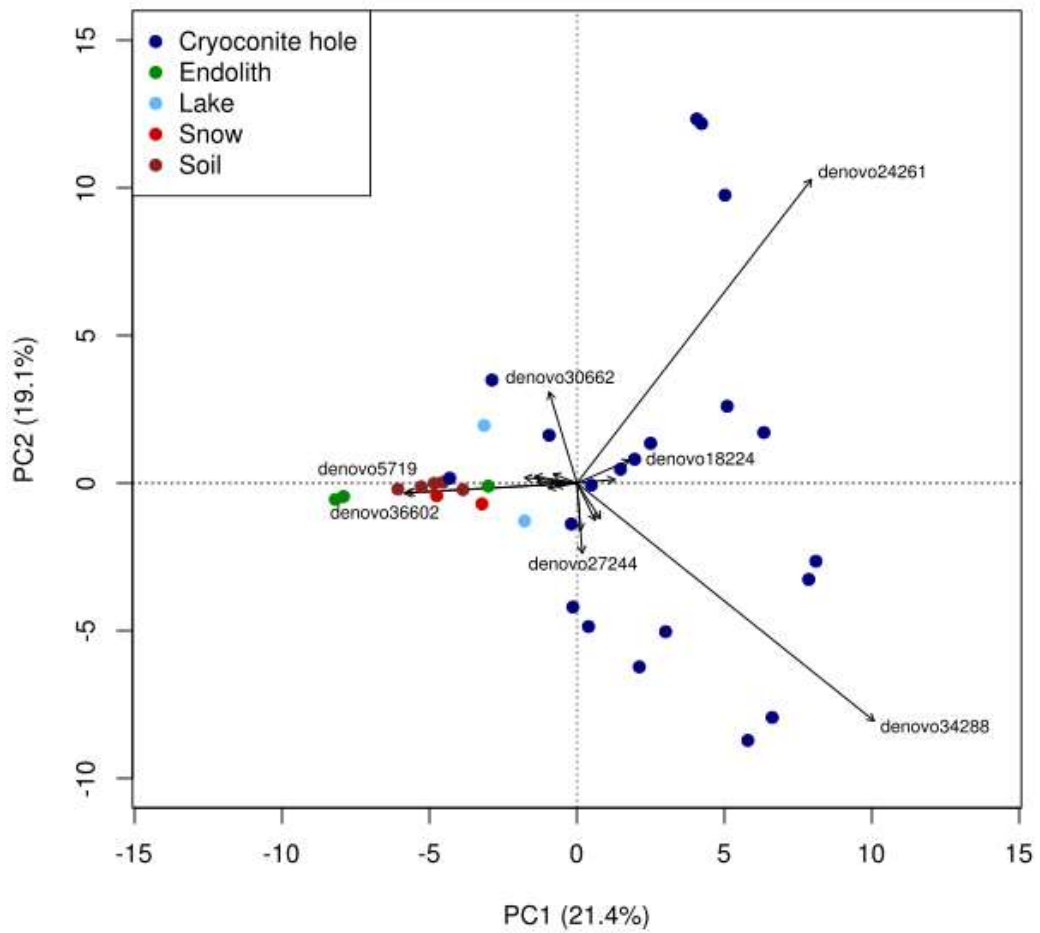

**Figure S2.** Principal component analysis of the eukaryotic OTUs. Samples cluster according to habitats.

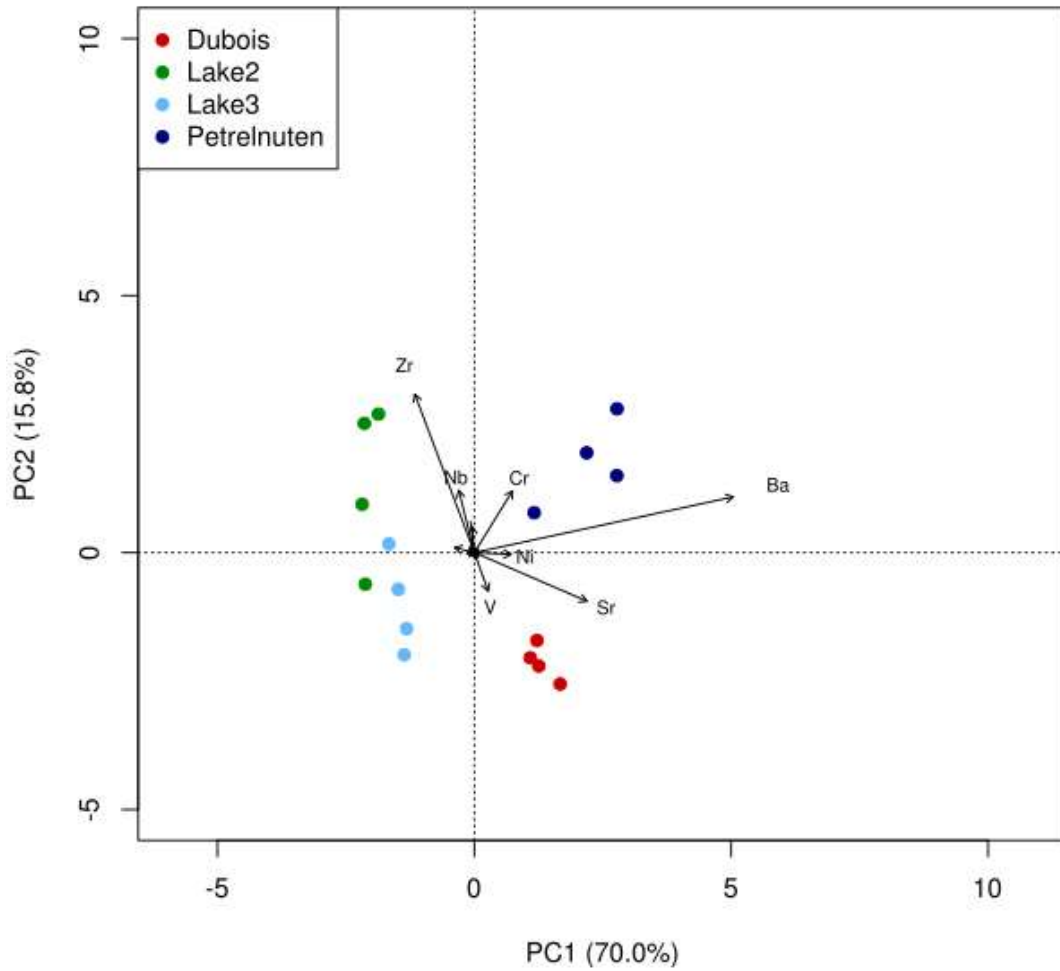

**Figure S3.** Principal component analysis of selected trace elements that cause the separation (primarily Zr, Ba and Sr).

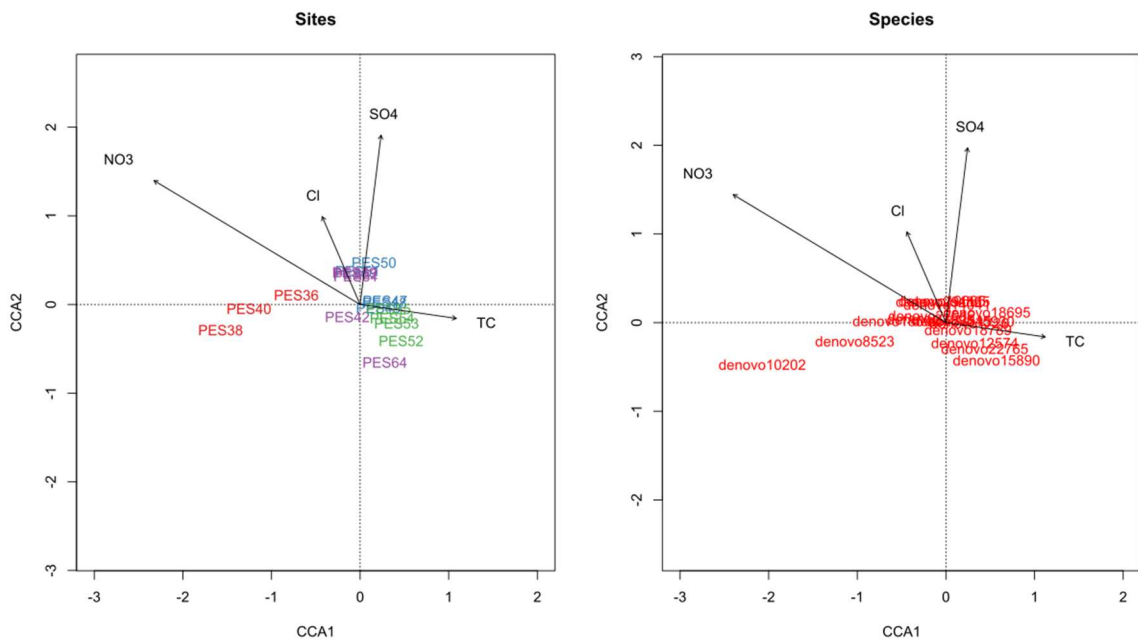

**Figure S4.** Partial canonical correspondence analysis of the bacterial abundances and all non-collinear environmental variables (i.e., after identification and exclusion of redundant predictor variables) and

without spatial effects. Samples from Lake 3 in Utsteinen clustered with higher nitrate concentration and samples from Dubois with a higher TC abundance. Otherwise no clear trends could be observed.

**Table S1.** Number of sequences before and after quality control for bacterial and eukaryotic sequences, respectively.

| Sample ID    | 16S                      |                         | 18S                      |                         |
|--------------|--------------------------|-------------------------|--------------------------|-------------------------|
|              | Before quality filtering | After quality filtering | Before quality filtering | After quality filtering |
| PES17_36     | 79285                    | 71418                   | 112519                   | 112201                  |
| PES17_38     | 115832                   | 111434                  | 44238                    | 44166                   |
| PES17_39     | 128336                   | 123761                  | 31865                    | 31789                   |
| PES17_40     | 107580                   | 104609                  | 27128                    | 27074                   |
| PES17_42     | 225182                   | 218495                  | 103515                   | 103323                  |
| PES17_43     | 219156                   | 213095                  | 67378                    | 67199                   |
| PES17_47     | 82531                    | 79949                   | 60130                    | 59998                   |
| PES17_48     | 123666                   | 120275                  | 64459                    | 64306                   |
| PES17_49     | 163446                   | 158674                  | 126366                   | 126115                  |
| PES17_50     | 107304                   | 104667                  | 158362                   | 158063                  |
| PES17_51     | 95033                    | 93296                   | -                        | -                       |
| PES17_52     | 113682                   | 110463                  | 119486                   | 119205                  |
| PES17_53     | 126238                   | 122760                  | 72656                    | 72461                   |
| PES17_54     | 120805                   | 117807                  | 181725                   | 181281                  |
| PES17_55     | 112134                   | 108809                  | 146821                   | 146408                  |
| PES17_56     | 193142                   | 187986                  | 154063                   | 153724                  |
| PES17_59     | 226518                   | 220298                  | 32560                    | 32444                   |
| PES17_60     | 186567                   | 182136                  | 213031                   | 212325                  |
| PES17_61     | 143702                   | 140104                  | 155784                   | 155222                  |
| PES17_62     | 104661                   | 102291                  | -                        | -                       |
| PES17_63     | 114068                   | 111261                  | 101205                   | 100998                  |
| PES17_64     | 101054                   | 98423                   | 70930                    | 70674                   |
| PES17_65     | 117504                   | 113810                  | 192746                   | 192282                  |
| <b>Total</b> | <b>3107426</b>           | <b>3015821</b>          | <b>2236967</b>           | <b>2231258</b>          |

**Table S2.** Distribution of 97% clustered bacterial OTUs assigned to the lowest possible taxonomic level. Values are the relative abundance of the taxa in percentage of total sequences and presented are all OTUs with >0.1% abundance.

| Phylum                                 | Class                | Order; Family; Genus; Species                    | PES36           | PES38                  | PES39 | PES40 | PES42 | PES43 | PES47 | PES48 | PES49 | PES50 | PES51 | PES52 |
|----------------------------------------|----------------------|--------------------------------------------------|-----------------|------------------------|-------|-------|-------|-------|-------|-------|-------|-------|-------|-------|
| Acidobacteria                          | [Chloracidobacteria] | RB41; Ellin6075                                  | 2.5             | 0.1                    | 0     | 0     | 0.6   | 1.2   | 3.7   | 7.7   | 0.9   | 0.3   | 0.3   | 17.3  |
| Actinobacteria                         | Acidimicrobia        | Acidimicrobiales; C111                           | 0               | <0.05                  | 0     | 0     | 7.4   | 3.1   | 6.1   | 3.2   | 5.9   | 3.8   | 3.3   | 8.5   |
|                                        |                      | Actinomycetales                                  | 1.1             | 1.0                    | 0.2   | 1.3   | 4.5   | 1.4   | 12.9  | 9.7   | 4.4   | 7.4   | 4.4   | 7.9   |
|                                        |                      | Actinomycetales; Geodermatophilaceae             | 0.5             | 0.7                    | 1.2   | 3.1   | 2.3   | 0.6   | 1.9   | 2.3   | 1.1   | 6.2   | 3.6   | 0.6   |
|                                        |                      | Actinomycetales; Intrasporangiaceae              | 0               | 0                      | 0     | 0     | 0     | 0     | 0     | 0     | 0.2   | 6.0   | 4.0   | 0     |
|                                        |                      | Actinomycetales; Kineosporiaceae                 | 0               | 3.9                    | 2.8   | 1.3   | 0     | 0     | 0     | 0     | 0     | 0     | 0     | 0     |
|                                        |                      | Actinomycetales; Microbacteriaceae               | 2.4             | 0.1                    | 5.5   | 0.1   | 0.1   | 0.1   | 0.0   | 0.0   | 0.1   | 0.1   | 0.1   | 0.1   |
|                                        |                      | Actinomycetales; Microbacteriaceae; Yonghaparkia | 1.8             | 4.0                    | 1.0   | 4.2   | 9.5   | 12.3  | 3.9   | 6.4   | 5.9   | 22.5  | 14.0  | 5.8   |
|                                        |                      | Actinomycetales; Nocardioideaceae                | 4.5             | 17.7                   | 17.4  | 27.9  | 7.2   | 2.9   | 2.1   | 3.7   | 3.7   | 4.4   | 10.6  | 5.1   |
|                                        |                      | Actinomycetales; Nocardioideaceae; Aeromicrobium | 0.5             | 0.2                    | 0.9   | 0.9   | 0.2   | 0.1   | <0.05 | <0.05 | 0.2   | 0.2   | 0.3   | 0.0   |
|                                        |                      | Actinomycetales; Sporichthyaceae                 | 1.2             | 17.3                   | 9.5   | 17.4  | 8.6   | 1.5   | 7.7   | 6.9   | 9.2   | 13.6  | 17.4  | 6.4   |
|                                        |                      | Bacteroidetes                                    | Thermoleophilia | Gaiellales; AK1AB1_02E | 0     | 0     | <0.05 | 0     | 1.1   | 0.9   | 0.2   | 0.2   | 0.1   | 0.1   |
| Solirubrobacterales; Patulibacteraceae | 0.4                  |                                                  |                 | 0.9                    | 0.8   | 2.5   | 0     | 0     | 0     | <0.05 | 0     | 0     | <0.05 | 0.1   |
| Bacteroidetes                          | Cytophagia           | Cytophagales                                     | 0               | 0                      | 0     | 0     | 0.1   | 3.3   | 0     | 0     | 0     | 0     | 0     | 0.1   |
|                                        |                      | Cytophagales; Cyclobacteriaceae                  | 0               | 0                      | 0     | 0     | <0.05 | 0.4   | 3.1   | 3.9   | 2.7   | 0.5   | 0.3   | 2.1   |

|                                                  |                    |                                                           |                                 |       |       |       |     |     |       |       |       |     |     |     |     |
|--------------------------------------------------|--------------------|-----------------------------------------------------------|---------------------------------|-------|-------|-------|-----|-----|-------|-------|-------|-----|-----|-----|-----|
|                                                  |                    | Cytophagales;<br>Cytophagaceae;<br>Hymenobacter           | 2.7                             | 25.2  | 25.1  | 12.6  | 0.5 | 0.5 | 0.9   | 5.3   | 4.3   | 1.4 | 0.5 | 0.6 |     |
|                                                  |                    | Cytophagales;<br>Cytophagaceae;<br>Spirosoma              | 0.3                             | 0     | 0     | <0.05 | 6.6 | 4.8 | 0.5   | 0.9   | 0.8   | 0.1 | 0.3 | 0.3 |     |
|                                                  | Flavo-<br>bacteria | Flavobacteriales;<br>Flavobacteriaceae;<br>Flavobacterium | 0.5                             | 0     | 0     | 0     | 0.5 | 5.3 | 0     | 0     | 0     | 6.7 | 1.4 | 0   |     |
|                                                  |                    | Sphingobacteriales;<br>Sphingobacteriaceae                | 0                               | 0     | 0     | 0.0   | 0.0 | 0   | 0.1   | 1.1   | 0.0   | 0.0 | 0.1 | 0   |     |
|                                                  | [Rhodo-<br>thermi] | [Rhodothermales];<br>Rhodothermaceae;<br>Rubricoccus      | 0.1                             | <0.05 | 0     | 0.0   | 1.7 | 1.5 | 0.0   | 0.3   | <0.05 | 0.4 | 0.2 | 0   |     |
|                                                  |                    | [Saprospirales];<br>Chitinophagaceae                      | 1.0                             | <0.05 | 0     | 0     | 6.9 | 3.1 | 0     | 0     | 0.7   | 0.1 | 1.0 | 0.8 |     |
|                                                  |                    | [Saprospirales];<br>Chitinophagaceae;<br>Segetibacter     | 0                               | 0     | 0     | 0     | 1.9 | 1.3 | 0     | 0     | 0.3   | 0.1 | 0.4 | 0.1 |     |
|                                                  | Chloroflexi        | Thermo-<br>microbia                                       | JG30-KF-CM45                    | 0     | 0     | 0     | 0   | 0.1 | 0.9   | <0.05 | <0.05 | 0   | 0.1 | 0.1 | 1.1 |
|                                                  | Cyanobacteria      | Oscillatori-<br>phyceideae                                | Chroococcales;<br>Xenococcaceae | 2.5   | <0.05 | <0.05 | 0.1 | 4.1 | 21.1  | 1.0   | 0.2   | 0.0 | 2.6 | 0.8 | 0.5 |
| Oscillatoriales;<br>Phormidiaceae;<br>Phormidium |                    |                                                           | 1.4                             | 0.1   | <0.05 | 0     | 0.4 | 0   | 4.1   | 9.8   | 17.4  | 1.2 | 0.5 | 9.4 |     |
| Synechococco-<br>phyceideae                      |                    | Pseudanabaenales;<br>Pseudanabaenaceae                    | 0.6                             | 0     | <0.05 | 0     | 0   | 0   | <0.05 | <0.05 | 0     | 4.5 | 1.3 | 0.8 |     |
| FBP                                              |                    |                                                           | 0.5                             | <0.05 | <0.05 | 0.1   | 4.1 | 9.0 | 0.5   | 0.7   | 0.8   | 0.1 | 0.3 | 0.1 |     |

|                |                        |                                                            |       |       |      |       |       |     |      |      |       |     |      |       |
|----------------|------------------------|------------------------------------------------------------|-------|-------|------|-------|-------|-----|------|------|-------|-----|------|-------|
| Proteobacteria | Alphaproteobacteria    | Caulobacterales;<br>Caulobacteraceae;<br>Mycoplana         | 0     | 0     | 0    | 0     | <0.05 | 0.1 | 2.4  | 0.5  | 0.6   | 0.2 | 0.1  | 0.1   |
|                |                        | Rhodobacterales;<br>Rhodobacteraceae;<br>Rubellimicrobium  | 0     | 0     | 0    | 0     | 4.8   | 1.9 | 3.3  | 2.9  | 2.3   | 2.6 | 1.0  | 0.9   |
|                |                        | Rhodospirillales;<br>Acetobacteraceae                      | 0.1   | 0     | 0.1  | 0.7   | 5.0   | 1.3 | 0.1  | 0.1  | 0.5   | 1.0 | 0.6  | 0.2   |
|                |                        | Rhodospirillales;<br>Acetobacteraceae;<br>Roseococcus      | 0.5   | 0     | 0    | 0     | 0.1   | 0.7 | 3.0  | 3.1  | 0.9   | 1.5 | 0.5  | 0.9   |
|                |                        | Sphingomonadales;<br>Sphingomonadaceae                     | 0     | <0.05 | 0.1  | 0     | 0.2   | 0.2 | 0    | 0    | <0.05 | 0.1 | 0.1  | 0.1   |
|                |                        | Sphingomonadales;<br>Sphingomonadaceae;<br>Kaistobacter    | 7.9   | 7.4   | 14.6 | 15.2  | 16.1  | 3.9 | 19.1 | 20.6 | 10.6  | 4.7 | 16.3 | 0.7   |
|                | Betaproteobacteria     | Burkholderiales;<br>Comamonadaceae                         | 5.5   | 0.1   | 1.2  | 0.5   | 0.6   | 1.2 | 0.6  | 1.2  | 0.9   | 0.2 | 0.6  | 0.6   |
|                |                        | Burkholderiales;<br>Comamonadaceae                         | 3.6   | 15.2  | 15.0 | 11.1  | 1.4   | 0.9 | 0.3  | 0.4  | 1.4   | 0.3 | 1.8  | 0.5   |
|                |                        | Burkholderiales;<br>Comamonadaceae;<br>Hydrogenophaga      | 0.1   | 0     | 0    | <0.05 | <0.05 | 0.1 | 0.0  | 0.2  | <0.05 | 2.5 | 0.6  | <0.05 |
|                |                        | Burkholderiales;<br>Oxalobacteraceae                       | 0.0   | 4.0   | 0.4  | 0.6   | 1.2   | 0   | 0    | 0    | 0     | 0   | 0    | 0     |
|                |                        | Burkholderiales;<br>Oxalobacteraceae;<br>Janthinobacterium | 1.0   | <0.05 | 0    | 0     | <0.05 | 0   | 0    | 0    | 0     | 0   | 0.1  | 0     |
|                | Gamma-proteo- bacteria | Xanthomonadales;<br>Xanthomonadaceae                       | 0.4   | <0.05 | 0    | 0     | 0.7   | 5.6 | 0.1  | 0    | <0.05 | 0.1 | 0.1  | 0.4   |
|                |                        | Xanthomonadales;<br>Xanthomonadaceae;<br>Lysobacter        | 0     | 0     | 0    | 0     | 0.3   | 0.6 | 1.6  | 1.3  | 1.3   | 0.5 | 0.7  | 0.8   |
|                |                        | Xanthomonadales;<br>Xanthomonadaceae;<br>Thermomonas       | <0.05 | 0     | 0    | 0     | 0.1   | 1.0 | 15.3 | 2.6  | 17.8  | 3.2 | 5.0  | 17.2  |

|                   |                  |                                                          |      |       |       |       |     |     |     |     |     |     |     |       |
|-------------------|------------------|----------------------------------------------------------|------|-------|-------|-------|-----|-----|-----|-----|-----|-----|-----|-------|
| Verrucomicrobia   | Verrucomicrobiae | Verrucomicrobiales;<br>Verrucomicrobiaceae               | 0.6  | <0.05 | <0.05 | <0.05 | 1.1 | 5.6 | 4.0 | 3.1 | 3.9 | 0.6 | 0.7 | 2.3   |
|                   |                  | Verrucomicrobiales;<br>Verrucomicrobiaceae               | 0.5  | 0     | 0     | 0     | 0   | 0   | 0.9 | 1.0 | 0.6 | 0.1 | 0.0 | 3.7   |
|                   |                  | [Chthoniobacterales];<br>[Chthoniobacteraceae];<br>DA101 | 0    | <0.05 | 0     | 0     | 0   | 0   | 0.8 | 0.5 | 0.6 | 0.1 | 0.1 | 3.8   |
| <b>Unassigned</b> |                  |                                                          | 55.4 | 3.0   | 4.4   | 0.4   | 0.2 | 1.8 | 0.2 | 0.1 | 0.1 | 0.1 | 5.5 | <0.05 |

Table S2. continued.

| Phylum         | Class                | Order; Family; Genus; Species                       | PES53 | PES54 | PES55 | PES56 | PES59 | PES60 | PES61 | PES62 | PES63 | PES64 | PES65 |
|----------------|----------------------|-----------------------------------------------------|-------|-------|-------|-------|-------|-------|-------|-------|-------|-------|-------|
| Acidobacteria  | [Chloracidobacteria] | RB41; Ellin6075                                     | 12.4  | 11.2  | 7.1   | 1.6   | 0     | 0     | 0     | 0     | <0.05 | <0.05 | 3.5   |
| Actinobacteria | Acidimicrobiia       | Acidimicrobiales; C111                              | 3.7   | 3.8   | 1.6   | 2.5   | 1.1   | 1.0   | 2.0   | 1.0   | 2.6   | 2.6   | 0.4   |
|                |                      | Actinomycetales                                     | 6.2   | 11.5  | 13.3  | 9.3   | 0.3   | 0.6   | 1.4   | 2.3   | 1.7   | 1.4   | 0.2   |
|                |                      | Actinomycetales;<br>Geodermatophilaceae             | 0.6   | 0.9   | 1.6   | 1.5   | 0.2   | 0.3   | 0.3   | 0.3   | 1.1   | 0.2   | 0.7   |
|                |                      | Actinomycetales; Intrasporangiaceae                 | 0     | 0     | 0     | 0     | 0     | 0     | 0     | 0     | 0     | 0     | 0     |
|                |                      | Actinomycetales; Kineosporiaceae                    | 0     | 0     | 0     | 0     | 0     | 0     | 0     | 0     | 0     | 0     | 0     |
|                |                      | Actinomycetales; Microbacteriaceae                  | 0.1   | <0.05 | <0.05 | 0.1   | 0.5   | 0.4   | 0.2   | 0.3   | 0.3   | 0.1   | 1.7   |
|                |                      | Actinomycetales; Microbacteriaceae;<br>Yonghaparkia | 5.2   | 7.1   | 6.6   | 8.7   | 18.9  | 19.7  | 19.3  | 16.7  | 18.7  | 16.0  | 5.7   |
|                |                      | Actinomycetales; Nocardioideaceae                   | 3.9   | 4.3   | 2.9   | 2.1   | 3.7   | 3.2   | 2.4   | 2.4   | 2.6   | 1.6   | 1.9   |
|                |                      | Actinomycetales; Nocardioideaceae;<br>Aeromicrobium | 0.2   | 0.0   | 0.2   | 0.0   | 0.0   | 0     | 0     | 0     | <0.05 | 0     | 1.2   |
|                |                      | Actinomycetales; Sporichthyaceae                    | 7.3   | 8.8   | 12.1  | 8.0   | 2.2   | 2.6   | 3.2   | 2.9   | 2.3   | 0.9   | 1.2   |
| Ther           |                      | Gaiellales; AK1AB1_02E                              | 0.5   | 0.3   | 0.2   | 0.1   | 0     | 0     | 0     | 0     | 0     | 0     | 0.1   |



|                                      |                                   |                                                        |       |       |       |       |       |       |      |      |       |      |       |
|--------------------------------------|-----------------------------------|--------------------------------------------------------|-------|-------|-------|-------|-------|-------|------|------|-------|------|-------|
|                                      |                                   | Solirubrobacterales;<br>Patulibacteraceae              | 0.2   | 0.1   | 0.1   | 0.0   | 0     | 0     | 0    | 0    | 0     | 0    | <0.05 |
| <b>Bacterioidetes</b>                | <b>Cytophagia</b>                 | Cytophagales                                           | 0.1   | 0.2   | 0.1   | <0.05 | 0     | 0     | 0    | 0    | 0     | 0    | 0     |
|                                      |                                   | Cytophagales; Cyclobacteriaceae                        | 0.2   | 1.0   | <0.05 | 0.9   | 0     | 0     | 0    | 0    | 0.0   | 1.2  | 0     |
|                                      |                                   | Cytophagales; Cytophagaceae;<br>Hymenobacter           | 2.0   | 2.4   | 2.0   | 5.3   | 9.1   | 6.1   | 5.0  | 4.9  | 4.9   | 2.9  | 5.4   |
|                                      |                                   | Cytophagales; Cytophagaceae;<br>Spirosoma              | 2.4   | 0.8   | 1.0   | 2.2   | 0.1   | 0.1   | 0.2  | 0.1  | 0.6   | 0    | 0.2   |
|                                      | <b>Flavo-<br/>bacterii</b>        | Flavobacteriales; Flavobacteriaceae;<br>Flavobacterium | 0     | 0     | 0     | 0     | 0     | 0     | 0    | 0    | 0     | 15.3 | 0.6   |
|                                      | <b>Sphingo-<br/>bacteria</b>      | Sphingobacteriales;<br>Sphingobacteriaceae             | 0     | 0     | 0     | 0     | 0     | 0     | 0    | 0    | 0     | 3.1  | 0     |
|                                      | <b>[Rhodo-<br/>thermi]</b>        | [Rhodothermales];<br>Rhodothermaceae; Rubricoccus      | <0.05 | <0.05 | 0.1   | 0.1   | 0     | 0     | 0    | 0    | 0.1   | 0.3  | 0.8   |
|                                      |                                   | [Saprospirales]; Chitinophagaceae                      | 0.6   | 0.8   | 2.9   | 5.1   | <0.05 | <0.05 | 0    | 0    | 0     | 0    | 1.0   |
|                                      |                                   | [Saprospirales]; Chitinophagaceae;<br>Segetibacter     | 0.1   | 0.2   | 0.3   | <0.05 | 0     | 0     | 0    | 0    | 0     | 0    | 1.8   |
| <b>Chloroflexi</b>                   | <b>Thermo-<br/>microbia</b>       | JG30-KF-CM45                                           | 0.1   | 0.4   | 0.1   | 0.1   | 0     | 0     | 0    | 0    | 0     | 0.1  | 0.4   |
| <b>Cyanobacteria</b><br><sup>a</sup> | <b>Oscillatorio-<br/>phycidae</b> | Chroococcales; Xenococcaceae                           | 1.7   | 4.7   | 6.5   | 7.0   | 45.9  | 48.2  | 40.9 | 52.8 | 43.2  | 0.3  | 0.3   |
|                                      |                                   | Oscillatoriales; Phormidiaceae;<br>Phormidium          | 18.9  | 20.2  | 20.0  | 15.0  | 0     | 0     | 0    | 0    | <0.05 | 27.8 | 38.0  |

|                |                           |                                                         |                                            |       |     |      |       |       |       |       |       |       |       |
|----------------|---------------------------|---------------------------------------------------------|--------------------------------------------|-------|-----|------|-------|-------|-------|-------|-------|-------|-------|
|                | Synechococco-<br>phycidae | Pseudanabaenales;<br>Pseudanabaenaceae                  | 12.0                                       | 4.4   | 6.9 | 12.3 | 0     | 0     | 0     | 0     | 0     | 0     | 0     |
| FBP            |                           |                                                         | 0.2                                        | 0.1   | 0.1 | 0.1  | <0.05 | <0.05 | <0.05 | <0.05 | 0.1   | 2.0   | <0.05 |
| Proteobacteria | Alphaproteobacteria       | Caulobacterales; Caulobacteraceae;<br>Mycoplana         | 0                                          | <0.05 | 0   | 0.1  | 0     | 0     | 0     | 0     | 0.1   | 3.8   | 3.8   |
|                |                           | Rhodobacterales; Rhodobacteraceae;<br>Rubellimicrobium  | 0.9                                        | 1.1   | 0.6 | 1.2  | 0.3   | 0.3   | 0.5   | 0.1   | 0.9   | 0.7   | 0.5   |
|                |                           | Rhodospirillales; Acetobacteraceae                      | 0.6                                        | 0.3   | 0.3 | 0.5  | 0.1   | 0.1   | 0.1   | <0.05 | 0.6   | 0.2   | 0.2   |
|                |                           | Rhodospirillales; Acetobacteraceae;<br>Roseococcus      | 0.5                                        | 1.1   | 0.3 | 1.7  | 0.0   | <0.05 | 0.0   | <0.05 | 1.2   | 2.9   | 0.5   |
|                |                           | Sphingomonadales;<br>Sphingomonadaceae                  | 0.3                                        | 0.1   | 0.1 | 0.1  | 0     | 0     | <0.05 | 0     | 0.0   | <0.05 | 8.9   |
|                |                           | Sphingomonadales;<br>Sphingomonadaceae; Kaistobacter    | 5.5                                        | 4.1   | 3.1 | 6.0  | 2.7   | 2.3   | 5.3   | 3.0   | 3.9   | 2.4   | 1.8   |
|                | Betaproteo-<br>bacteria   | Burkholderiales; Comamonadaceae                         | 0.7                                        | 0.5   | 0.3 | 0.5  | 0.1   | 0.1   | 0.3   | 0.2   | 1.2   | 0.2   | 1.2   |
|                |                           | Burkholderiales; Comamonadaceae                         | 0.7                                        | 0.8   | 1.8 | 0.3  | 0.1   | <0.05 | <0.05 | <0.05 | 0.1   | <0.05 | 1.3   |
|                |                           | Burkholderiales; Comamonadaceae;<br>Hydrogenophaga      | 0                                          | 0     | 0   | 0    | <0.05 | <0.05 | 0.1   | 0.1   | 0.4   | 3.9   | 1.3   |
|                |                           | Burkholderiales; Oxalobacteraceae                       | 0                                          | 0     | 0   | 0    | 0     | 0     | 0     | 0     | 0     | 0     | 0     |
|                |                           | Burkholderiales; Oxalobacteraceae;<br>Janthinobacterium | 0                                          | 0     | 0   | 0    | 0     | 0     | 0     | 0     | 0     | 0     | 4.8   |
|                | Gamma-<br>proteobacteria  | Xanthomonadales;<br>Xanthomonadaceae                    | 0.3                                        | 0.7   | 0.7 | 1.7  | 10.8  | 12.2  | 17.1  | 11.1  | 11.9  | 1.0   | 0.2   |
|                |                           | Xanthomonadales;<br>Xanthomonadaceae; Lysobacter        | 2.3                                        | 0.8   | 0.5 | 0.3  | 1.6   | 1.5   | 0.7   | 0.2   | 0.3   | 0.6   | 0.2   |
|                |                           | Xanthomonadales;<br>Xanthomonadaceae; Thermomonas       | 4.4                                        | 3.2   | 1.1 | 2.1  | 0     | 0     | 0     | 0     | 0.0   | 8.0   | 0     |
|                | Verru-<br>comi-<br>cobia  | Verru-<br>co-                                           | Verrucomicrobiales;<br>Verrucomicrobiaceae | 1.2   | 1.2 | 0.6  | 0.2   | <0.05 | <0.05 | <0.05 | <0.05 | <0.05 | 0.1   |

|                   |  |                                                       |       |     |     |     |     |     |     |     |     |     |     |
|-------------------|--|-------------------------------------------------------|-------|-----|-----|-----|-----|-----|-----|-----|-----|-----|-----|
|                   |  | Verrucomicrobiales;<br>Verrucomicrobiaceae            | 1.4   | 1.4 | 0.3 | 2.1 | 0   | 0   | 0   | 0   | 0   | 0.3 | 4.3 |
|                   |  | [Chthoniobacterales];<br>[Chthoniobacteraceae]; DA101 | 2.9   | 1.6 | 1.0 | 1.4 | 0   | 0   | 0   | 0   | 0   | 0.1 | 4.8 |
| <b>Unassigned</b> |  |                                                       | <0.05 | 0.1 | 3.7 | 0.0 | 2.2 | 1.3 | 1.1 | 1.7 | 1.1 | 0.2 | 0.8 |

**Table S3.** The core bacterial taxa present in all cryoconite hole samples at >1% relative abundance.

| Phylum                | Class                     | Order                 | Family; Genus; Species             | OTU ID      | PES36 | PES38 | PES39 | PES40 | PES42 | PES43 | PES47 | PES48 | PES49 | PES50 | PES51 | PES52 |
|-----------------------|---------------------------|-----------------------|------------------------------------|-------------|-------|-------|-------|-------|-------|-------|-------|-------|-------|-------|-------|-------|
| <b>Actinobacteria</b> | Actinobacteria            | Actinomycetales       |                                    | denovo1726  | 0.2   | <0.05 | 0.2   | 1.1   | 4.1   | 1.3   | 12.0  | 8.8   | 4.0   | 6.8   | 3.6   | 7.2   |
|                       |                           |                       | Geodermatophilaceae                | denovo19685 | 0.1   | 0.6   | 1.0   | 2.7   | 2.1   | 0.5   | 1.7   | 2.1   | 1.0   | 5.7   | 2.9   | 0.5   |
|                       |                           |                       | Microbacteriaceae;<br>Yonghaparkia | denovo14041 | 0.3   | 3.5   | 0.9   | 3.7   | 8.7   | 11.3  | 3.6   | 5.8   | 5.4   | 20.7  | 11.2  | 5.3   |
|                       |                           |                       | Nocardioideaceae                   | denovo18602 | 0.7   | 14.5  | 12.6  | 17.4  | 3.5   | 1.4   | 0.8   | 1.4   | 1.2   | 1.8   | 4.4   | 0.6   |
|                       |                           |                       | Sporichthyaceae                    | denovo23995 | 0.2   | 15.0  | 8.3   | 15.4  | 7.9   | 1.4   | 7.2   | 6.3   | 8.5   | 12.6  | 13.9  | 5.9   |
|                       |                           |                       | Nocardioideaceae                   | denovo15045 | 0     | <0.05 | 0.1   | 0.5   | 1.0   | 0.3   | 0.1   | 0.2   | 0.3   | 0.3   | 1.0   | 3.2   |
|                       |                           |                       | Nocardioideaceae                   | denovo22480 | 0     | <0.05 | 0.1   | 0.9   | 1.4   | 0.4   | 0.2   | 0.3   | 0.4   | 0.4   | 1.7   | 0.2   |
|                       |                           |                       | Sporichthyaceae                    | denovo3326  | <0.05 | <0.05 | <0.05 | <0.05 | 0.2   | <0.05 | 0.1   | 0.1   | 0.1   | 0.1   | 0.2   | <0.05 |
| <b>Cyanobacteria</b>  | Oscillatorio-<br>hycideae | Chroococcales         | Xenococcaceae                      | denovo4865  | 0.5   | <0.05 | <0.05 | <0.05 | 3.7   | 19.1  | 0.9   | 0.1   | <0.05 | 2.4   | 0.7   | 0.5   |
| <b>FBP</b>            |                           |                       |                                    | denovo15099 | <0.05 | <0.05 | <0.05 | 0.1   | 3.2   | 5.1   | <0.05 | <0.05 | <0.05 | <0.05 | 0.3   | 0.1   |
| <b>Proteobacteria</b> | Alphaproteobacteria       | Sphingo-<br>monadales | Sphingomonadaceae;<br>Kaistobacter | denovo27012 | 1.5   | 6.4   | 12.7  | 13.4  | 10.8  | 2.7   | 14.7  | 15.1  | 9.0   | 3.9   | 12.9  | 0.5   |
|                       |                           | Rhodo-<br>spirillales | Acetobacteraceae                   | denovo19929 | <0.05 | <0.05 | 0     | 0.6   | 4.6   | 1.2   | 0.1   | 0.1   | 0.4   | 0.9   | 0.5   | 0.2   |

|  |                      |                 |               |            |     |     |     |     |     |     |     |     |     |     |     |     |
|--|----------------------|-----------------|---------------|------------|-----|-----|-----|-----|-----|-----|-----|-----|-----|-----|-----|-----|
|  | Betaproteo- bacteria | Burkholderiales | Xenococcaceae | denovo6584 | 1.1 | 0.1 | 1.0 | 0.4 | 0.6 | 1.1 | 0.6 | 1.1 | 0.9 | 0.2 | 0.5 | 0.5 |
|--|----------------------|-----------------|---------------|------------|-----|-----|-----|-----|-----|-----|-----|-----|-----|-----|-----|-----|

Table S3. continued.

| Phylum         | Class                       | Order            | Family; Genus; Species             | OTU ID      | PES53 | PES54 | PES55 | PES56 | PES59 | PES60 | PES61 | PES62 | PES63 | PES64 | PES65 |
|----------------|-----------------------------|------------------|------------------------------------|-------------|-------|-------|-------|-------|-------|-------|-------|-------|-------|-------|-------|
| Actinobacteria | Actinobacteria              | Actinomycetales  |                                    | denovo1726  | 5.8   | 10.9  | 12.2  | 8.7   | 0.3   | 0.5   | 1.3   | 2.2   | 1.5   | 1.3   | 0.2   |
|                |                             |                  | Geodermatophilaceae                | denovo19685 | 0.6   | 0.9   | 1.5   | 1.4   | 0.2   | 0.2   | 0.2   | 0.3   | 1.1   | 0.2   | 0.6   |
|                |                             |                  | Microbacteriaceae;<br>Yonghaparkia | denovo14041 | 4.8   | 6.8   | 6.0   | 8.1   | 17.8  | 19.0  | 18.6  | 16.1  | 17.5  | 14.6  | 4.8   |
|                |                             |                  | Nocardioideaceae                   | denovo18602 | 1.2   | 1.3   | 1.1   | 0.7   | 1.0   | 1.0   | 0.8   | 0.9   | 0.9   | 0.7   | 0.9   |
|                |                             |                  | Sporichthyaceae                    | denovo23995 | 6.8   | 8.4   | 11.1  | 7.4   | 2.1   | 2.5   | 3.0   | 2.8   | 2.2   | 0.8   | 1.0   |
|                |                             |                  | Nocardioideaceae                   | denovo15045 | 1.7   | 1.9   | 0.8   | 0.5   | <0.05 | <0.05 | <0.05 | <0.05 | 0.1   | 0.1   | 0.2   |
|                |                             |                  | Nocardioideaceae                   | denovo22480 | 0.5   | 0.4   | 0.4   | 0.2   | <0.05 | <0.05 | <0.05 | <0.05 | 0.1   | 0.2   | 0.3   |
|                |                             |                  | Sporichthyaceae                    | denovo3326  | 0.1   | <0.05 | <0.05 | 0.2   | 0.2   | 0.1   | 0.1   | 0.1   | 0.1   | 0.1   | <0.05 |
| Cyanobacteria  | Oscillatorio-<br>phyceideae | Chroococcales    | Xenococcaceae                      | denovo4865  | 1.6   | 4.5   | 5.9   | 6.4   | 42.6  | 46.0  | 39.1  | 50.7  | 39.8  | 0.2   | 0.3   |
| FBP            |                             |                  |                                    | denovo15099 | 0.1   | 0.1   | 0.1   | <0.05 | <0.05 | <0.05 | <0.05 | <0.05 | 0.1   | <0.05 | <0.05 |
| Proteobacteria | Alphaproteobacteria         | Sphingomonadales | Sphingomonadaceae;<br>Kaistobacter | denovo27012 | 3.9   | 3.2   | 2.4   | 4.2   | 1.8   | 1.6   | 3.7   | 2.0   | 2.4   | 1.5   | 1.4   |
|                |                             | Rhodospirillales | Acetobacteraceae                   | denovo19929 | 0.5   | 0.3   | 0.2   | 0.4   | 0.1   | 0.1   | 0.1   | <0.05 | 0.6   | 0.2   | 0.2   |
|                | Betaproteo-<br>bacteria     | Burkholderiales  | Xenococcaceae                      | denovo6584  | 0.6   | 0.5   | 0.3   | 0.4   | 0.1   | 0.1   | 0.3   | 0.2   | 1.1   | 0.2   | 1.0   |

**Table S3. continued:** continued. The NCBI hits of core bacterial taxa.

| Phylum         | Class                      | Order                 | Family; Genus; Species             | OTU ID      | Best NCBI hit                   | Accession number | Similarity [%] |
|----------------|----------------------------|-----------------------|------------------------------------|-------------|---------------------------------|------------------|----------------|
| Actinobacteria | Actinobacteria             | Actinomycetales       |                                    | denovo1726  | Uncultured actinobacterium      | FJ490312.1       | 99             |
|                |                            |                       | Geodermatophilaceae                | denovo19685 | Blastococcus sp.                | EU704838.1       | 99             |
|                |                            |                       | Microbacteriaceae;<br>Yonghaparkia | denovo14041 | Leifsonia sp.                   | KT965169.1       | 99             |
|                |                            |                       | Nocardioideaceae                   | denovo18602 | Nocardioides sp.                | KY386518.1       | 99             |
|                |                            |                       | Sporichthyaceae                    | denovo23995 | Uncultured actinobacterium      | EU931108.1       | 99             |
|                |                            |                       | Nocardioideaceae                   | denovo15045 | Nocardioides sp.                | GQ420967.1       | 99             |
|                |                            |                       | Nocardioideaceae                   | denovo22480 | Nocardioides sp.                | GQ420967.1       | 97             |
|                |                            |                       | Sporichthyaceae                    | denovo3326  | Leifsonia sp.                   | KT965169.1       | 96             |
| Cyanobacteria  | Oscillatorio-<br>phycideae | Chroococcales         | Xenococcaceae                      | denovo4865  | Uncultured cyanobacterium       | HQ230210.1       | 99             |
| FBP            |                            |                       |                                    | denovo15099 | Uncultured endolithic bacterium | AB374370.1       | 99             |
| Proteobacteria | Alphaproteobacteria        | Sphingo-<br>monadales | Sphingomonadaceae;<br>Kaistobacter | denovo27012 | Sphingomonas sp.                | MF002313.1       | 99             |
|                |                            | Rhodo-<br>spirillales | Acetobacteraceae                   | denovo19929 | Uncultured bacterium            | FR667548.1       | 97             |
|                | Betaproteo-<br>bacteria    | Burkholderiales       | Comamonadaceae                     | denovo6584  | Polaromonas sp.                 | KF414342.1       | 99             |

**Table S4.** Taxonomic identification of the discriminating OTUs in the principal component analysis (Figure 3).

| OTU ID      | Phylum         | Class                  | Order            | Family              | Genus                   | Species | Best NCBI hit                   | Accession number | Similarity [%] |
|-------------|----------------|------------------------|------------------|---------------------|-------------------------|---------|---------------------------------|------------------|----------------|
| denovo1726  | Actinobacteria | Actinobacteria         | Actinomycetales  | -                   | -                       | -       | Uncultured actinobacterium      | FJ490312.1       | 99             |
| denovo3345  | Bacteroidetes  | Cytophagia             | Cytophagales     | Cytophagaceae       | <i>Hymenobacter</i>     | -       | Uncultured Bacteroidetes        | KC442558.1       | 98             |
| denovo4865  | Cyanobacteria  | Oscillatoriophyycideae | Chroococcales    | Xenococcaceae       | -                       | -       | Uncultured cyanobacterium       | HQ230210.1       | 99             |
| denovo6584  | Proteobacteria | Betaproteobacteria     | Burkholderiales  | Comamonadaceae      | -                       | -       | Polaromonas sp.                 | KF414342.1       | 99             |
| denovo8523  | Proteobacteria | Betaproteobacteria     | Burkholderiales  | Comamonadaceae      | -                       | -       | Uncultured Comamonadaceae       | GQ454852.1       | 99             |
| denovo10202 | Bacteroidetes  | Cytophagia             | Cytophagales     | Cytophagaceae       | <i>Hymenobacter</i>     | -       | Hymenobacter sp. R-36490        | FR682723.1       | 99             |
| denovo12574 | Proteobacteria | Gammaproteobacteria    | Xanthomonadales  | Xanthomonadaceae    | <i>Thermomonas</i>      | -       | Uncultured Gammaproteobacterium | FR749755.1       | 99             |
| denovo14041 | Actinobacteria | Actinobacteria         | Actinomycetales  | Microbacteriaceae   | <i>Yonghaparkia</i>     | -       | Leifsonia sp.                   | KT965169.1       | 99             |
| denovo15890 | Acidobacteria  | [Chloracidobacteria]   | RB41             | Ellin6075           | -                       | -       | Uncultured Blastocatella sp.    | LT625222.1       | 99             |
| denovo15930 | Proteobacteria | Alphaproteobacteria    | Rhodobacterales  | Rhodobacteraceae    | <i>Rubellimicrobium</i> | -       | Rubellimicrobium sp             | JQ401336.1       | 99             |
| denovo18602 | Actinobacteria | Actinobacteria         | Actinomycetales  | Nocardioidaceae     | -                       | -       | Nocardioides sp.                | KY386518.1       | 99             |
| denovo18695 | Cyanobacteria  | Synechococcophycideae  | Pseudanabaenales | Pseudanabaenaceae   | -                       | -       | Leptolyngbya sp. LEGE 07075     | HM217080.1       | 98             |
| denovo18789 | Actinobacteria | Acidimicrobiia         | Acidimicrobiales | C111                | -                       | -       | Uncultured Actinobacterium      | EF628488.1       | 99             |
| denovo19685 | Actinobacteria | Actinobacteria         | Actinomycetales  | Geodermatophilaceae | -                       | -       | Blastococcus sp.                | EU704838.1       | 99             |
| denovo19799 | Acidobacteria  | [Chloracidobacteria]   | RB41             | Ellin6075           | -                       | -       | Uncultured acidobacterium       | JQ402009.1       | 99             |
| denovo22765 | Cyanobacteria  | Oscillatoriophyycideae | Oscillatoriales  | Phormidiaceae       | <i>Phormidium</i>       | -       | Phormidium sp. CCALA 846        | GQ504034.1       | 99             |
| denovo23995 | Actinobacteria | Actinobacteria         | Actinomycetales  | Sporichthyaceae     | -                       | -       | Agrococcus sp.                  | KF029486.1       | 99             |

**Table S5.** Distribution of 99% clustered eukaryotic OTUs assigned to the lowest possible taxonomic level. Values are the relative abundance of the taxa in percentage of total sequences and presented are all OTUs with >0.1% abundance.

|                |                                    |                                                                 | PES36                                                             | PES38 | PES39 | PES40 | PES42 | PES43 | PES47 | PES48 | PES49 | PES50 | PES52 |       |
|----------------|------------------------------------|-----------------------------------------------------------------|-------------------------------------------------------------------|-------|-------|-------|-------|-------|-------|-------|-------|-------|-------|-------|
| Archaeplastida | Charophyta                         | Brassicales; Brassica; Brassica oleracea var. capitata          | 0.6                                                               | <0.05 | 0     | 0     | 0     | 0     | 0     | 0     | 0     | 0     | 0     |       |
|                |                                    | Poales; Triticum; Triticum aestivum                             | 0.6                                                               | 0     | 0     | 0     | 0     | <0.05 | 0     | <0.05 | 0     | 0     | <0.05 |       |
|                |                                    | Phragmoplastophyta; Zygnematophyceae; Mesotaenium sp. AG-2009-1 | 4.4                                                               | 0.1   | 0.1   | 0     | 0     | 0     | <0.05 | <0.05 | <0.05 | <0.05 | 0     |       |
|                | Chloroplastida                     | Chlorophyta                                                     | Chlorophyceae; Chlorococcum oleofaciens; Chlorococcum oleofaciens | 0.2   | 0     | <0.05 | 0     | <0.05 | 0.2   | 0     | 0     | 0     | <0.05 | 78.8  |
|                |                                    |                                                                 | Trebouxiophyceae; Actinastrum hantzschii; Actinastrum hantzschii  | 1.9   | <0.05 | 95.3  | 96.3  | 0.1   | 0.5   | 18.1  | 89.4  | 1.0   | 21.9  | 7.0   |
|                |                                    |                                                                 | Trebouxiophyceae; uncultured Dunaliellaceae                       | 30.1  | 0.2   | 0     | 0.2   | 0     | 0     | 0     | 0     | 0     | 0     | 0     |
|                |                                    |                                                                 | Trebouxiophyceae; uncultured eukaryote                            | 4.7   | 0.1   | 0.0   | 0     | 0     | <0.05 | 0.0   | 0.2   | 0     | 0     | 0     |
|                |                                    |                                                                 | Chlorodendrales; Tetraselmis; Tetraselmis subcordiformis          | 0     | 0     | 0     | 0     | 0.0   | 0     | 0     | 0     | 0     | 0     | 0.0   |
|                |                                    |                                                                 | Prasiolales; Prasiola; Prasiola furfuracea                        | 37.6  | 0.2   | 0.1   | 0.0   | 0.1   | 0.0   | <0.05 | <0.05 | 0     | 0     | 0     |
|                |                                    |                                                                 | Prasiolales; Stichococcus; Stichococcus jenerensis                | 1.4   | 98.8  | 4.3   | 3.4   | 48.6  | 0.2   | <0.05 | <0.05 | 0.0   | 0.1   | <0.05 |
| Rhodopycea     | Bangiales; Pyropia; Pyropia fallax | 1.3                                                             | <0.05                                                             | 0.0   | 0.1   | 1.5   | 26.2  | 80.7  | 2.3   | 95.4  | 77.9  | 2.3   |       |       |
| Excavata       | Discoba                            | Discicristat                                                    | Tetramitia; AND12; Heterolobosea sp. OSA                          | 0     | 0     | 0     | 0     | 0     | <0.05 | 0     | 0.1   | 0     | 0     | 0     |
| Opisthokonta   | Holozoa                            | Metazoa                                                         | Bdelloidea; Adinetida; Hypsibius dujardini                        | 3.7   | 0.1   | 0     | 0     | 0     | 0     | 0     | 0     | 0     | 0     | <0.05 |
|                |                                    |                                                                 | Eutardigrada; Parachela; uncultured eukaryote                     | 2.6   | 0.4   | 0     | 0     | 0     | 0     | 0     | 0     | 0.1   | 0     | 0     |

|            |              |               |                                                                           |                                                  |     |       |       |       |       |       |       |       |     |       |       |
|------------|--------------|---------------|---------------------------------------------------------------------------|--------------------------------------------------|-----|-------|-------|-------|-------|-------|-------|-------|-----|-------|-------|
| SAR        | Nucleotmycea | Fungi         | Eurotiomycetes; Eurotiales; Penicillium sp. NS051-06                      | 0.8                                              | 0   | 0     | 0     | 0     | 0     | 0     | 0     | 0     | 0   | 0     |       |
|            |              |               | Eurotiomycetes; Eurotiales; Talaromyces radicus                           | 0                                                | 0   | 0     | 0     | 0     | 0     | 0     | 0     | 0     | 0   | 0     | 0     |
|            |              |               | Saccharomycetes; Saccharomycetales; Saccharomyces cerevisiae Kyokai no. 7 | 0                                                | 0   | 0     | 0     | 0     | <0.05 | <0.05 | <0.05 | 0     | 0   | 0     | 0     |
|            |              |               | Incertae Sedis; Hyaloraphidium; Hyaloraphidium curvatum                   | 0                                                | 0   | 0     | 0     | <0.05 | 0     | 0.1   | 0.2   | 0.1   | 0   | 0     | 0     |
|            |              |               | Incertae Sedis; Malassezia; uncultured eukaryote                          | 4.0                                              | 0.1 | 0.1   | 0     | <0.05 | <0.05 | 0     | 0     | 0     | 0   | 0     | <0.05 |
|            |              |               | Incertae Sedis; Malassezia; uncultured fungus                             | 0                                                | 0   | 0     | 0     | 0     | 0     | 0     | 0.0   | 0     | 0   | 0     | 0     |
|            | Alveolata    | Ciliophora    | Phyllopharyngea; Cyrtophoria; Colepidae environmental sample              | 0                                                | 0   | 0     | 0     | 0     | 0     | 0     | 0     | 0     | 0   | 0     | 0     |
|            |              | Rhizaria      | Cercozoa                                                                  | Glissomonadida; Heteromita; Cercozoa sp. B128    | 0.3 | <0.05 | 0     | 0     | 29.1  | <0.05 | <0.05 | 0     | 0   | 0     | 0     |
|            |              |               |                                                                           | Glissomonadida; Heteromita; uncultured cercozoan | 0   | 0     | 0     | 0     | 0.1   | 12.2  | 0     | 0     | 0.4 | 0     | 0     |
|            |              |               |                                                                           | Glissomonadida; Heteromita; uncultured eukaryote | 0.5 | 0     | 0     | 0     | 0     | 0     | 0     | 0     | 0   | <0.05 | 11.6  |
|            |              |               |                                                                           | Glissomonadida; uncultured eukaryote             | 0   | 0     | 0     | 0     | 0.8   | 57.4  | 0     | 0     | 0   | 0     | 0     |
|            |              |               |                                                                           | Thecofilosea; E-A1                               | 0   | 0     | 0     | 0     | 0     | 0     | 0     | 0.0   | 0   | 0     | 0     |
|            |              |               |                                                                           | Thecofilosea; uncultured eukaryote               | 0   | 0     | 0     | <0.05 | 19.7  | 3.3   | 1.1   | 7.5   | 3.1 | 0.1   | 0.3   |
|            |              | Stramenopiles | Ochrophyta                                                                | Chrysophyceae; uncultured eukaryote              | 1.4 | 0     | 0     | 0     | 0     | 0     | 0     | <0.05 | 0   | 0     | 0     |
|            |              |               |                                                                           | Chrysocapsales; Hydrurus; uncultured Hydrurus    | 4.0 | <0.05 | 0     | 0     | 0     | <0.05 | 0     | 0     | 0   | <0.05 | <0.05 |
| Unassigned |              |               | 0                                                                         | 0                                                | 0   | 0     | <0.05 | 0.1   | 0     | 0     | 0     | 0     | 0   |       |       |





|                                                  |              |            |                                                                                 |       |       |       |       |     |       |       |       |      |       |     |
|--------------------------------------------------|--------------|------------|---------------------------------------------------------------------------------|-------|-------|-------|-------|-----|-------|-------|-------|------|-------|-----|
|                                                  | Nucleotmycea | Fungi      | Eurotiomycetes; Eurotiales;<br>Penicillium sp. NS051-06                         | <0.05 | <0.05 | 0     | 0     | 0.8 | 2.2   | 1.6   | 0     | 0    | 0     |     |
|                                                  |              |            | Eurotiomycetes; Eurotiales;<br>Talaromyces radicus                              | 0     | 0     | 0     | 0     | 1.7 | 3.8   | 1.1   | <0.05 | 0    | 0     |     |
|                                                  |              |            | Saccharomycetes;<br>Saccharomycetales; Saccharomyces<br>cerevisiae Kyokai no. 7 | 0     | 0.1   | 0     | 0     | 5.2 | 13.3  | 17.9  | <0.05 | 0    | 0     |     |
|                                                  |              |            | Incertae Sedis; Hyaloraphidium;<br>Hyaloraphidium curvatum                      | 0     | 0     | 0     | 0     | 0   | 0     | 0.2   | 0.1   | 31.2 | 0.1   |     |
|                                                  |              |            | Incertae Sedis; Malassezia;<br>uncultured eukaryote                             | 0.1   | 0.7   | 0     | 0     | 1.0 | 1.7   | 2.0   | 0     | 0    | 0     |     |
|                                                  |              |            | Incertae Sedis; Malassezia;<br>uncultured fungus                                | 0     | 0.1   | 0     | 0     | 0.2 | 0.8   | 2.5   | 0     | 0    | 0     |     |
| SAR                                              | Alveolat     | Ciliophora | Phyllopharyngea; Cyrtophoria;<br>Colepidae environmental sample                 | 0     | 0     | 0     | 0     | 0.0 | 0     | 0     | 0     | 2.5  | 29.5  |     |
|                                                  | Rhizaria     | Cercozoa   | Glissomonadida; Heteromita;<br>Cercozoa sp. B128                                | 0     | 0     | <0.05 | 0     | 0   | <0.05 | 0     | 0     | 0    | 0     | 0.0 |
|                                                  |              |            | Glissomonadida; Heteromita;<br>uncultured cercozoan                             | 0     | 0     | 0     | 0     | 0   | <0.05 | 0.0   | 0     | 8.4  | 0.6   |     |
|                                                  |              |            | Glissomonadida; Heteromita;<br>uncultured eukaryote                             | 4.1   | 26.1  | <0.05 | 10.3  | 0   | <0.05 | 0     | 0     | 0.0  | 0     |     |
|                                                  |              |            | Glissomonadida; uncultured<br>eukaryote                                         | 0     | 0.1   | 0     | 0.0   | 0   | <0.05 | 0.1   | 0     | 0.2  | 26.1  |     |
|                                                  |              |            | Thecofilosea; E-A1                                                              | 22.0  | 0.0   | <0.05 | 2.6   | 0   | 0     | 0     | 0     | 0    | <0.05 |     |
|                                                  |              |            | Thecofilosea; uncultured eukaryote                                              | 60.5  | 13.3  | 93.2  | 28.2  | 2.8 | 0.4   | 0.9   | 6.0   | 20.4 | 41.9  |     |
|                                                  | Stramenopila | Ochrophyta | Chrysophyceae; uncultured<br>eukaryote                                          | <0.05 | 0.3   | 0     | <0.05 | 0   | 0.2   | 0.2   | 0.0   | 0    | 0     |     |
| Chrysocapsales; Hydrurus;<br>uncultured Hydrurus |              |            | <0.05                                                                           | 0.9   | 0     | <0.05 | 0.1   | 0.4 | 0.6   | <0.05 | <0.05 | 0    |       |     |
| Unassigned                                       |              |            | 0                                                                               | <0.05 | 0     | 0.1   | 15.8  | 4.6 | 22.0  | 0.3   | 0     | 0    |       |     |

**Table S6.** The core eukaryotic taxa present in all cryoconite hole samples at >1% relative abundance.

| OTU ID      | PES36 | PES38 | PES39 | PES40 | PES42 | PES43 | PES47 | PES48 | PES49 | PES50 | PES52 | PES53 | PES54 | PES55 | PES56 | PES59 | PES60 | PES61 | PES63 | PES64 | PES65 |
|-------------|-------|-------|-------|-------|-------|-------|-------|-------|-------|-------|-------|-------|-------|-------|-------|-------|-------|-------|-------|-------|-------|
| denovo9728  | 1.4   | <0.05 | 94.5  | 95.5  | 0.1   | 0.5   | 17.9  | 87.3  | 1.0   | 21.7  | 6.9   | 6.0   | 32.8  | 2.3   | 27.5  | 0.1   | 0.1   | <0.05 | 0.1   | <0.05 | 0.6   |
| denovo13741 | 1.0   | <0.05 | <0.05 | 0.1   | 1.5   | 25.8  | 79.8  | 2.3   | 94.0  | 77.3  | 2.2   | 4.9   | 17.8  | 4.2   | 28.9  | 25.7  | 4.9   | 10.0  | 85.0  | 0.9   | 0.8   |

**Table S6.** continued. The closest NCBI hits of core Eukaryotic taxa.

| OTU ID      |                |  |                |             |                  |                        | NCBI                             | Accession number | Similarity [%] |
|-------------|----------------|--|----------------|-------------|------------------|------------------------|----------------------------------|------------------|----------------|
| denovo9728  | Archaeplastida |  | Chloroplastida | Chlorophyta | Trebouxiophyceae | Actinastrum hantzschii | Chlorella sp.                    |                  | 100            |
| denovo13741 |                |  | Rhodophyceae   | Bangiales   | Pyropia          | Pyropia fallax         | Porpyrax fallax, Ulothrix zonata |                  | 99             |

**Table S7.** Taxonomic identification of the discriminating OTUs in the principal component analysis (Figure 5).

| OTU ID      | Unranked       | Division    | Class            | Order          | Family         | Genus               | Species                        | Best NCBI hit                                     | Similarity [%] |
|-------------|----------------|-------------|------------------|----------------|----------------|---------------------|--------------------------------|---------------------------------------------------|----------------|
| denovo5719  | Rhizaria       | Cercozoa    | Sarcomonadea     | Glissomonadida | Heteromitidae  | <i>Heteromita</i>   |                                | Uncultured eukaryote clone                        | 99             |
| denovo7317  | Rhizaria       | Cercozoa    | Thecofilosea     |                |                |                     |                                | Rhogostoma cylindrica                             | 99             |
| denovo9728  | Archaeplastida | Chlorophyta | Trebouxiophyceae | Chlorellales   | Chlorellaceae  | <i>Actinastrum</i>  | <i>Actinastrum hantzschii</i>  | Chlorella sp.                                     | 100            |
| denovo10938 | Archaeplastida | Charophyta  | Spermatophyta    | Poales         | Poaceae        | <i>Triticum</i>     | <i>Triticum aestivum</i>       | Triticum aestivum, Uncultured fungal clone        | 100            |
| denovo12309 | Archaeplastida | Chlorophyta | Trebouxiophyceae | Prasiolales    | Prasiolaceae   | <i>Stichococcus</i> | <i>Stichococcus jenerensis</i> | Chlorella spp./Raphidonema spp./Stichococcus spp. | 99             |
| denovo13741 | Archaeplastida | Rhodophyta  | Bangiophyceae    | Bangiales      | Bangiaceae     | <i>Pyropia</i>      | <i>Pyropia fallax</i>          | Porpyrax fallax, Ulothrix zonata                  | 99             |
| denovo18224 | Rhizaria       | Cercozoa    | Thecofilosea     |                |                |                     |                                | No blast hit                                      |                |
| denovo24261 | Archaeplastida | Rhodophyta  | Bangiophyceae    | Bangiales      | Bangiaceae     | <i>Pyropia</i>      | <i>Pyropia fallax</i>          | Porpyrax fallax, Ulothrix zonata                  | 99             |
| denovo27244 | Metazoa        | Rotifera    | Bdelloidea       | Adinetida      | Adinetidae     | <i>Adineta</i>      | <i>Adineta vaga</i>            | Adineta vaga                                      | 99             |
| denovo30662 | Fungi          | Ascomycota  | Lecanoromycetes  | Acarosporales  | Acarosporaceae | <i>Acarospora</i>   | <i>Acarospora peliscypha</i>   | Acarospora spp.                                   | 99             |
| denovo34288 | Fungi          | Ascomycota  | Thelebolaceae    | Thelebolales   | Thelebolaceae  | <i>Thelebolus</i>   | <i>Thelebolus stercoreus</i>   | Thelebolus spp.                                   | 99             |
| denovo30662 | Fungi          | Ascomycota  | Lecanoromycetes  | Acarosporales  | Acarosporaceae | <i>Acarospora</i>   | <i>Acarospora peliscypha</i>   | Acarospora spp.                                   | 99             |

**Table S8.** Overview of solid total carbon (TC), total organic carbon (TOC), total nitrogen (N), total organic nitrogen (TON), thermogravimetry, thermovaporization and pyrolysis analyses.

| Sample | Location    | TC [%] | TOC [%] | TN [%] | TON [%] | Total mass loss in TGA [%] | TOC [%] | Thermovaporization (300°C) Live C [mg/g TOC] | Pyrolysis (300–600°C) Labile C [mg/g TOC] |
|--------|-------------|--------|---------|--------|---------|----------------------------|---------|----------------------------------------------|-------------------------------------------|
| PES36  | Lake 3      | 0.12   | 0.02    | 0.01   | <0.01   | 0.52                       | 0.017   | 0                                            | 58                                        |
| PES37  | Lake 3      | 0.12   | 0.09    | 0.01   | <0.01   | -                          |         |                                              |                                           |
| PES38  | Lake 3      | 0.02   | b.d.    | <0.01  | <0.01   | 0.78                       |         |                                              |                                           |
| PES39  | Lake 3      | 0.02   | 0.02    | <0.01  | <0.01   | 0.95                       |         |                                              |                                           |
| PES40  | Lake 3      | 0.02   | 0.03    | <0.01  | <0.01   | 0.63                       |         |                                              |                                           |
| PES47  | Lake 2      | 0.10   | 0.05    | <0.01  | <0.01   | 0.47                       |         |                                              |                                           |
| PES48  | Lake 2      | 0.22   | 0.05    | 0.01   | <0.01   | 1.00                       |         |                                              |                                           |
| PES49  | Lake 2      | 0.13   | 0.10    | <0.01  | <0.01   | 1.02                       | 0.095   | 0                                            | 55                                        |
| PES50  | Lake 2      | 0.04   | 0.08    | <0.01  | <0.01   | 0.21                       |         |                                              |                                           |
| PES51  | Lake 2      | 0.03   | 0.02    | <0.01  | <0.01   | 0.62                       |         |                                              |                                           |
| PES52  | Dubois      | 0.05   | 0.03    | <0.01  | <0.01   | 1.12                       |         |                                              |                                           |
| PES53  | Dubois      | 0.03   | 0.04    | <0.01  | <0.01   | 0.61                       |         |                                              |                                           |
| PES54  | Dubois      | 0.07   | 0.03    | <0.01  | <0.01   | 0.65                       |         |                                              |                                           |
| PES55  | Dubois      | 0.05   | 0.05    | <0.01  | <0.01   | 0.78                       | 0.047   | 0                                            | 74                                        |
| PES56  | Dubois      | 0.03   | 0.04    | <0.01  | <0.01   | 0.42                       |         |                                              |                                           |
| PES42  | Petrelnuten | 0.06   | 0.03    | <0.01  | <0.01   | 0.61                       |         |                                              |                                           |
| PES43  | Petrelnuten | 0.11   | 0.08    | <0.01  | <0.01   | -                          |         |                                              |                                           |
| PES59  | Petrelnuten | 0.12   | 0.03    | 0.01   | <0.01   | 0.35                       |         |                                              |                                           |
| PES60  | Petrelnuten | 0.13   | 0.12    | <0.01  | <0.01   | -                          |         |                                              |                                           |
| PES61  | Petrelnuten | 0.08   | 0.12    | <0.01  | <0.01   | 0.33                       | 0.123   | 0                                            | 17                                        |
| PES62  | Petrelnuten | 0.10   | 0.14    | <0.01  | <0.01   | 0.88                       | 0.136   | 0                                            | 5                                         |
| PES63  | Petrelnuten | 0.24   | 0.10    | 0.01   | <0.01   | 0.35                       | 0.103   | 0                                            | 10                                        |
| PES64  | Petrelnuten | 0.16   | 0.23    | 0.01   | <0.01   | 0.96                       | 0.229   | 0                                            | 19                                        |
| PES65  | Petrelnuten | 0.14   | 0.12    | 0.01   | <0.01   | 0.98                       |         |                                              |                                           |

**Table S9.** Chemical composition of cryoconite sediments (expressed as oxides) from X-ray fluorescence (XRF) analysis.

| Sample | Location    | SiO <sub>2</sub> [%] | TiO <sub>2</sub> [%] | Al <sub>2</sub> O <sub>3</sub> [%] | Fe <sub>2</sub> O <sub>3</sub> [%] | MnO [%] | MgO [%] | CaO [%] | Na <sub>2</sub> O [%] | K <sub>2</sub> O [%] | P <sub>2</sub> O <sub>5</sub> [%] | LOI Tiegel [%] | Sum [%] |
|--------|-------------|----------------------|----------------------|------------------------------------|------------------------------------|---------|---------|---------|-----------------------|----------------------|-----------------------------------|----------------|---------|
| PES36  | Lake 3      | 63.6                 | 0.495                | 15.8                               | 5.81                               | 0.093   | 1.43    | 2.55    | 3.31                  | 5.84                 | 0.053                             | 0.63           | 99.67   |
| PES38  | Lake 3      | 58.6                 | 0.679                | 16.4                               | 8.44                               | 0.135   | 2.22    | 3.78    | 3.36                  | 5.05                 | 0.060                             | 0.83           | 99.57   |
| PES39  | Lake 3      | 55.8                 | 0.933                | 15.9                               | 10.65                              | 0.174   | 3.06    | 4.91    | 3.01                  | 3.93                 | 0.080                             | 1.14           | 99.57   |
| PES40  | Lake 3      | 62.6                 | 0.410                | 17.0                               | 5.02                               | 0.082   | 1.29    | 2.18    | 3.50                  | 7.01                 | 0.044                             | 0.66           | 99.72   |
| PES47  | Lake 2      | 68.5                 | 0.372                | 14.1                               | 4.77                               | 0.073   | 0.45    | 1.64    | 3.24                  | 5.99                 | 0.053                             | 0.49           | 99.61   |
| PES48  | Lake 2      | 72.2                 | 0.224                | 13.2                               | 3.00                               | 0.044   | 0.18    | 0.94    | 3.13                  | 5.75                 | 0.028                             | 1.01           | 99.66   |
| PES49  | Lake 2      | 65.7                 | 0.435                | 15.0                               | 5.30                               | 0.082   | 0.77    | 1.91    | 3.56                  | 5.81                 | 0.071                             | 0.99           | 99.63   |
| PES50  | Lake 2      | 73.4                 | 0.150                | 12.9                               | 2.33                               | 0.034   | 0.05    | 0.64    | 2.83                  | 6.18                 | 0.014                             | 1.25           | 99.82   |
| PES52  | Dubois      | 65.9                 | 0.529                | 15.0                               | 4.90                               | 0.088   | 1.94    | 3.63    | 3.56                  | 3.04                 | 0.143                             | 0.90           | 99.65   |
| PES53  | Dubois      | 67.5                 | 0.310                | 16.1                               | 3.09                               | 0.059   | 1.12    | 2.90    | 3.95                  | 3.86                 | 0.080                             | 0.71           | 99.62   |
| PES54  | Dubois      | 68.3                 | 0.355                | 15.1                               | 3.16                               | 0.063   | 1.24    | 3.13    | 3.54                  | 3.88                 | 0.098                             | 0.81           | 99.63   |
| PES55  | Dubois      | 67.4                 | 0.447                | 15.3                               | 3.90                               | 0.066   | 1.41    | 2.79    | 3.63                  | 3.77                 | 0.123                             | 0.85           | 99.65   |
| PES62  | Petrelnuten | 68.4                 | 0.325                | 14.7                               | 3.81                               | 0.059   | 0.78    | 2.26    | 3.39                  | 5.23                 | 0.055                             | 0.48           | 99.42   |
| PES63  | Petrelnuten | 67.0                 | 0.421                | 14.7                               | 4.67                               | 0.069   | 0.95    | 2.53    | 3.48                  | 5.12                 | 0.067                             | 0.41           | 99.45   |
| PES64  | Petrelnuten | 64.4                 | 0.524                | 14.8                               | 5.51                               | 0.092   | 1.82    | 3.64    | 3.33                  | 4.20                 | 0.095                             | 0.91           | 99.37   |
| PES65  | Petrelnuten | 60.6                 | 0.857                | 14.1                               | 8.42                               | 0.137   | 2.97    | 4.83    | 3.16                  | 2.97                 | 0.098                             | 1.21           | 99.34   |

**Table S9.** continued.

| Sample | Location | Ba [ppm] | Cr [ppm] | Ga [ppm] | Nb [ppm] | Ni [ppm] | Rb [ppm] | Sr [ppm] | V [ppm] | Y [ppm] | Zn [ppm] | Zr [ppm] |
|--------|----------|----------|----------|----------|----------|----------|----------|----------|---------|---------|----------|----------|
| PES36  | Lake 3   | 243      | 118      | 25       | 16       | <10      | 149      | 78       | 84      | 30      | 82       | 510      |
| PES38  | Lake 3   | 247      | 89       | 27       | 22       | 14       | 133      | 105      | 124     | 46      | 117      | 290      |
| PES39  | Lake 3   | 227      | 72       | 25       | 23       | 17       | 109      | 123      | 171     | 45      | 130      | 448      |
| PES40  | Lake 3   | 272      | 63       | 24       | 12       | <10      | 172      | 79       | 71      | 29      | 85       | 233      |
| PES47  | Lake 2   | 204      | 167      | 26       | 29       | <10      | 171      | 56       | 14      | 49      | 112      | 796      |
| PES48  | Lake 2   | 167      | 209      | 24       | 17       | <10      | 156      | 39       | <10     | 28      | 70       | 488      |
| PES49  | Lake 2   | 257      | 109      | 27       | 29       | <10      | 171      | 93       | 22      | 50      | 116      | 906      |
| PES50  | Lake 2   | 147      | 250      | 21       | 13       | <10      | 157      | 30       | 16      | 20      | 51       | 299      |
| PES52  | Dubois   | 785      | 202      | 21       | <10      | 24       | 116      | 366      | 73      | 28      | 77       | 214      |
| PES53  | Dubois   | 996      | 113      | 20       | <10      | <10      | 120      | 391      | 42      | 17      | 49       | 138      |

|              |             |      |     |    |     |    |     |     |     |    |     |     |
|--------------|-------------|------|-----|----|-----|----|-----|-----|-----|----|-----|-----|
| <b>PES54</b> | Dubois      | 840  | 129 | 20 | <10 | 13 | 121 | 336 | 39  | 21 | 52  | 172 |
| <b>PES55</b> | Dubois      | 785  | 144 | 19 | <10 | 13 | 133 | 324 | 55  | 23 | 61  | 191 |
| <b>PES62</b> | Petrelnuten | 1751 | 180 | 21 | 23  | 12 | 122 | 267 | 30  | 36 | 89  | 338 |
| <b>PES63</b> | Petrelnuten | 1758 | 321 | 22 | 28  | 18 | 114 | 251 | 43  | 41 | 98  | 453 |
| <b>PES64</b> | Petrelnuten | 1361 | 327 | 23 | 22  | 24 | 113 | 289 | 75  | 43 | 104 | 433 |
| <b>PES65</b> | Petrelnuten | 861  | 318 | 22 | 36  | 30 | 97  | 265 | 110 | 61 | 158 | 333 |

**Table S10.** Aqueous concentrations of nutrients and simple organics as analyzed by Ion Chromatography (IC) in  $\mu\text{gL}^{-1}$ .

| <b>Sample</b> | <b>Location</b> | <b>NO<sub>3</sub><sup>2-</sup></b> | <b>PO<sub>4</sub><sup>3-</sup></b> | <b>SO<sub>4</sub><sup>2-</sup></b> | <b>Cl<sup>-</sup></b> | <b>F<sup>-</sup></b> | <b>Oxalate</b> | <b>Formic acid</b> | <b>Acetate</b> | <b>Propionate</b> | <b>Butyrate</b> | <b>Valerate</b> |
|---------------|-----------------|------------------------------------|------------------------------------|------------------------------------|-----------------------|----------------------|----------------|--------------------|----------------|-------------------|-----------------|-----------------|
| <b>PES 36</b> | Lake 3          | 1.24                               | <0.2                               | 5.29                               | 3.02                  | 0.48                 | <0.2           | <0.1               | 1.71           | <0.1              | <0.1            | <0.1            |
| <b>PES 38</b> | Lake 3          | 1.81                               | <0.2                               | 7.66                               | 10.38                 | 0.35                 | <0.2           | 0.30               | 2.97           | 0.43              | <0.1            | <0.1            |
| <b>PES 40</b> | Lake 3          | 2.25                               | <0.2                               | 10.86                              | 5.47                  | 0.36                 | <0.2           | 0.23               | 6.91           | 0.34              | <0.1            | <0.1            |
| <b>PES 47</b> | Lake 2          | 0.32                               | <0.2                               | 5.18                               | 4.25                  | 0.40                 | <0.2           | 0.11               | 1.50           | 0.45              | <0.1            | <0.1            |
| <b>PES 48</b> | Lake 2          | 0.10                               | <0.2                               | 4.13                               | 2.92                  | 0.79                 | <0.2           | 0.19               | 1.88           | 0.48              | <0.1            | <0.1            |
| <b>PES 49</b> | Lake 2          | 0.55                               | <0.2                               | 8.64                               | 9.29                  | 0.59                 | <0.2           | 0.16               | 4.56           | 0.58              | <0.1            | <0.1            |
| <b>PES 50</b> | Lake 2          | 1.43                               | <0.2                               | 67.79                              | 19.68                 | 3.40                 | 0.71           | 0.22               | 1.02           | 0.14              | <0.1            | <0.1            |
| <b>PES 51</b> | Lake 2          | 1.33                               | <0.2                               | 46.45                              | 10.62                 | 1.29                 | <0.2           | 0.12               | 1.13           | 0.13              | <0.1            | <0.1            |
| <b>PES 52</b> | Dubois          | 0.14                               | <0.2                               | 6.32                               | 4.32                  | 0.16                 | <0.2           | 0.12               | 0.98           | 0.37              | <0.1            | <0.1            |
| <b>PES 53</b> | Dubois          | 0.30                               | <0.2                               | 10.66                              | 4.19                  | 0.24                 | <0.2           | 0.21               | 2.47           | 0.71              | <0.1            | <0.1            |
| <b>PES 54</b> | Dubois          | <0.02                              | <0.2                               | 12.87                              | 5.88                  | 0.13                 | <0.2           | 0.12               | 1.39           | 0.30              | <0.1            | <0.1            |
| <b>PES 55</b> | Dubois          | 0.37                               | <0.2                               | 11.44                              | 1.60                  | 0.22                 | <0.2           | <0.1               | 1.45           | 0.20              | <0.1            | <0.1            |
| <b>PES 42</b> | Petrelnuten     | 0.54                               | <0.2                               | 1.56                               | 1.17                  | 0.20                 | <0.2           | 0.73               | 6.13           | 1.02              | 0.20            | 0.22            |
| <b>PES 59</b> | Petrelnuten     | 0.28                               | <0.2                               | 2.42                               | 1.44                  | 0.18                 | 1.17           | 0.36               | 2.53           | 0.37              | <0.1            | <0.1            |
| <b>PES 61</b> | Petrelnuten     | 2.30                               | 0.85                               | 5.35                               | 1.51                  | 0.34                 | 1.61           | 0.36               | 17.37          | 0.35              | 0.15            | <0.1            |
| <b>PES 62</b> | Petrelnuten     | 0.55                               | 2.09                               | 5.86                               | 1.23                  | 0.22                 | 1.88           | 0.13               | 1.22           | 0.17              | <0.1            | <0.1            |
| <b>PES 64</b> | Petrelnuten     | 0.45                               | 0.25                               | 11.69                              | 5.12                  | 0.32                 | 1.46           | 0.17               | 2.25           | 0.24              | <0.1            | <0.1            |

**Supplementary Data S1: Output of the PCA of bacterial OTUs.**

Partitioning of variance:

| Inertia Proportion |       |   |
|--------------------|-------|---|
| Total              | 15747 | 1 |
| Unconstrained      | 15747 | 1 |

Eigenvalues, and their contribution to the variance

Importance of components:

|                       | PC1       | PC2       | PC3       | PC4       | PC5       | PC6       | PC7       | PC8       | PC9       |
|-----------------------|-----------|-----------|-----------|-----------|-----------|-----------|-----------|-----------|-----------|
| PC10                  | PC11      | PC12      | PC13      | PC14      | PC15      | PC16      |           |           |           |
| Eigenvalue            | 6793.2866 | 4678.3590 | 1.414e+03 | 1.028e+03 | 531.99097 | 404.11167 | 345.20355 | 191.92975 | 1.026e+02 |
|                       | 76.465707 | 66.640577 | 56.009731 | 28.149296 | 12.864986 | 1.078e+01 | 5.5524155 |           |           |
| Proportion Explained  | 0.4314    | 0.2971    | 8.976e-02 | 6.528e-02 | 0.03378   | 0.02566   | 0.02192   | 0.01219   | 6.516e-03 |
|                       | 0.004856  | 0.004232  | 0.003557  | 0.001788  | 0.000817  | 6.847e-04 | 0.0003526 |           |           |
| Cumulative Proportion | 0.4314    | 0.7285    | 8.183e-01 | 8.835e-01 | 0.91733   | 0.94300   | 0.96492   | 0.97711   | 9.836e-01 |
|                       | 0.988479  | 0.992711  | 0.996268  | 0.998056  | 0.998873  | 9.996e-01 | 0.9999101 |           |           |
| PC17                  |           |           |           |           |           |           |           |           |           |
| Eigenvalue            | 1.416e+00 |           |           |           |           |           |           |           |           |
| Proportion Explained  | 8.991e-05 |           |           |           |           |           |           |           |           |
| Cumulative Proportion | 1.000e+00 |           |           |           |           |           |           |           |           |

Scaling 2 for species and site scores

- \* Species are scaled proportional to eigenvalues
- \* Sites are unscaled: weighted dispersion equal on all dimensions
- \* General scaling constant of scores: 24.26073

Species scores

|             | PC1      | PC2     | PC3       | PC4      | PC5     | PC6      |
|-------------|----------|---------|-----------|----------|---------|----------|
| denovo1726  | 1.9330   | -3.3075 | -2.744973 | 0.89041  | -0.3236 | 0.37377  |
| denovo3345  | -1.0710  | -1.4295 | -0.829714 | 0.63621  | 0.7122  | -0.71516 |
| denovo4865  | -11.2220 | -2.0645 | -0.714512 | 1.61216  | -0.2443 | -0.82563 |
| denovo8523  | 2.1145   | 4.3312  | -0.002888 | 0.96140  | 0.1050  | -0.88119 |
| denovo10202 | 1.7369   | 5.8445  | 0.292209  | 1.57188  | -0.3297 | -1.62305 |
| denovo12574 | 3.4820   | -3.5348 | -1.728445 | -2.31705 | -0.9573 | -1.91509 |
| denovo14041 | -3.6746  | -1.8151 | -1.220601 | -0.48451 | 2.1839  | -0.68703 |
| denovo15890 | 3.0874   | -3.6962 | -0.710738 | 2.29696  | -2.5047 | -0.50447 |
| denovo15930 | 0.4346   | -1.5190 | -1.400352 | -1.04964 | 0.4520  | 0.45420  |
| denovo18602 | 1.2955   | 4.1246  | -0.830046 | 0.88979  | 0.5602  | -0.73865 |
| denovo18695 | 1.6246   | -2.4502 | -0.934114 | 3.50553  | 0.5347  | 1.32931  |
| denovo18789 | 0.4817   | -2.6949 | -1.881208 | -1.20691 | -0.2353 | -0.37626 |
| denovo19685 | 0.9268   | 0.1985  | -1.592742 | 0.05793  | 0.9241  | 0.65926  |
| denovo22765 | 5.5384   | -6.0109 | 3.455035  | 1.07373  | 1.9540  | -1.21702 |
| denovo23995 | 2.3194   | 1.2102  | -3.190476 | 1.61198  | 1.0131  | -0.63293 |
| denovo27012 | 1.9544   | 1.9546  | -2.696771 | -0.89699 | 0.7428  | 0.07036  |
| denovo29111 | -5.9147  | -1.1008 | 0.212286  | 0.39085  | -0.1575 | -0.99265 |

Site scores (weighted sums of species scores)

|       | PC1     | PC2      | PC3      | PC4      | PC5      | PC6    |
|-------|---------|----------|----------|----------|----------|--------|
| PES36 | 0.7064  | 3.98609  | 9.33174  | -3.77326 | -9.48330 | 14.451 |
| PES38 | 3.2222  | 11.50566 | 0.98320  | 4.14821  | 0.60878  | -6.651 |
| PES39 | 3.5435  | 11.99882 | 1.24401  | 3.15030  | -3.00226 | -3.458 |
| PES40 | 3.2832  | 10.67471 | -2.71133 | 2.72923  | 2.49249  | -1.338 |
| PES42 | -0.1608 | 1.91838  | -5.16052 | -4.91939 | 3.22027  | 7.447  |
| PES43 | -4.9232 | 0.56563  | -0.01738 | -4.43271 | -3.60905 | 2.009  |
| PES47 | 3.9929  | -2.70408 | -7.09890 | -7.17259 | -6.52145 | -1.398 |



PES48 4.3767 -2.40723 -3.31813 -2.18144 -0.72628 2.237  
PES49 5.1712 -2.69284 -1.03963 -8.71273 4.86474 -8.135  
PES50 0.9759 -1.11788 -7.33151 -0.43796 7.69668 7.047  
PES51 2.2320 1.69301 -7.18152 -3.67781 3.75658 4.116  
PES52 4.4278 -5.55594 -0.98030 -1.45140 -13.66172 -6.453  
PES53 4.3186 -5.28861 0.57451 8.09853 -3.05366 1.652  
PES54 3.0778 -5.70140 -0.38226 7.32414 -1.69439 -2.447  
PES55 2.4506 -4.75291 0.08320 10.05463 1.29713 1.652  
PES56 1.2654 -4.71465 -0.95717 7.60960 5.74090 3.116  
PES59 -8.7342 -0.05903 1.39786 0.16083 -0.45844 -1.557  
PES60 -9.1794 -0.32675 0.86797 0.84275 0.09254 -2.726  
PES61 -8.7210 -0.43970 -0.97533 -0.07724 0.42860 -2.707  
PES62 -9.1640 -0.47268 -0.21848 1.86899 -1.24315 -1.905  
PES63 -8.2342 -0.63115 -0.71051 -0.38146 0.36328 -1.311  
PES64 2.7418 -3.69534 9.33742 -8.05294 7.12704 -5.731  
PES65 3.3307 -1.78212 14.26309 -0.71629 5.76468 2.089

**Supplementary Data 2:** Output of the PCA of the eukaryotic OTUs.

Partitioning of variance:

|               | Inertia | Proportion |
|---------------|---------|------------|
| Total         | 15469   | 1          |
| Unconstrained | 15469   | 1          |

Eigenvalues, and their contribution to the variance

Importance of components:

|                       | PC1       | PC2       | PC3       | PC4       | PC5       | PC6       | PC7       | PC8       | PC9      |
|-----------------------|-----------|-----------|-----------|-----------|-----------|-----------|-----------|-----------|----------|
| Eigenvalue            | 3556.0027 | 3170.4533 | 2735.8550 | 1956.9294 | 1.135e+03 | 735.39034 | 664.64005 | 420.57004 | 323.2648 |
| Proportion Explained  | 0.2299    | 0.2050    | 0.1769    | 0.1265    | 7.339e-02 | 0.04754   | 0.04297   | 0.02719   | 0.0209   |
| Cumulative Proportion | 0.2299    | 0.4348    | 0.6117    | 0.7382    | 8.116e-01 | 0.85915   | 0.90211   | 0.92930   | 0.9502   |
|                       | 0.96598   | 0.97640   | 9.853e-01 | 9.928e-01 | 0.99661   | 0.998912  | 9.998e-01 |           |          |
|                       | PC17      | PC18      | PC19      |           |           |           |           |           |          |
| Eigenvalue            | 2.1080097 | 4.405e-01 | 2.930e-02 |           |           |           |           |           |          |
| Proportion Explained  | 0.0001363 | 2.848e-05 | 1.894e-06 |           |           |           |           |           |          |
| Cumulative Proportion | 0.9999696 | 1.000e+00 | 1.000e+00 |           |           |           |           |           |          |

Scaling 2 for species and site scores

- \* Species are scaled proportional to eigenvalues
- \* Sites are unscaled: weighted dispersion equal on all dimensions
- \* General scaling constant of scores: 23.58416

Species scores

|             | PC1      | PC2      | PC3     | PC4       | PC5       | PC6     |
|-------------|----------|----------|---------|-----------|-----------|---------|
| denovo630   | 0.21428  | 0.59621  | -0.2311 | 0.486920  | -1.566124 | 2.5029  |
| denovo2262  | 0.28787  | 0.67569  | 0.6802  | -0.526218 | 0.067123  | 0.2428  |
| denovo5580  | 1.64674  | 0.61362  | 0.9724  | -1.540197 | 0.169338  | -0.3139 |
| denovo6766  | -0.21175 | 0.55173  | 0.2299  | 2.059635  | -1.827537 | 2.4818  |
| denovo7317  | -1.51171 | 1.80307  | -8.0330 | -1.461693 | 1.864655  | -0.1565 |
| denovo7358  | -0.02315 | 0.65206  | 0.6404  | -0.353579 | 0.082539  | 0.2432  |
| denovo9691  | 0.02972  | 1.38594  | 0.7367  | 1.592919  | 0.390766  | 0.3988  |
| denovo9728  | -8.38999 | -4.83868 | 2.0418  | -1.903572 | -0.255986 | -0.7586 |
| denovo10529 | 1.73524  | 0.59058  | 1.0236  | -2.146429 | 0.003463  | -0.2367 |
| denovo10938 | 2.95208  | 1.21416  | 1.7092  | -3.762391 | -0.042161 | -0.2944 |
| denovo12309 | -1.23435 | 4.36815  | 3.1591  | 3.829199  | 2.896415  | -1.3305 |
| denovo13741 | 5.45465  | -7.68878 | -0.9051 | 2.347243  | 1.330446  | -0.4851 |
| denovo13822 | -0.05318 | 1.08974  | -1.5834 | 0.213848  | -1.816457 | -0.3682 |
| denovo18417 | 0.70609  | 1.01138  | -1.6878 | 1.647614  | -3.979861 | -3.0613 |
| denovo21615 | 1.93243  | 0.42366  | 0.8629  | -1.989633 | 0.096171  | -0.3652 |
| denovo27253 | -0.42022 | -0.53445 | 0.1142  | 0.001703  | -0.509331 | 0.9990  |
| denovo28736 | -0.46569 | 0.03486  | -1.5948 | -0.489182 | 1.086853  | 0.2660  |
| denovo29133 | 2.10434  | 0.88593  | 1.6992  | -2.953475 | -0.033885 | -0.1408 |
| denovo30251 | -0.49077 | -0.12643 | -0.9470 | -0.446115 | 0.734645  | 0.4070  |

Site scores (weighted sums of species scores)

|       | PC1      | PC2     | PC3    | PC4     | PC5      | PC6      |
|-------|----------|---------|--------|---------|----------|----------|
| PES36 | 0.8848   | 4.2389  | 3.4155 | -2.7643 | 0.17514  | 2.10197  |
| PES38 | -1.2094  | 9.8767  | 5.6640 | 8.1509  | 9.07234  | -5.23181 |
| PES39 | -10.1635 | -1.3921 | 4.9316 | -2.5700 | -0.62555 | -3.56796 |
| PES40 | -10.1778 | -1.7729 | 4.6998 | -2.6251 | -0.77559 | -3.04725 |
| PES42 | -0.1265  | 8.2890  | 4.5611 | 10.5825 | 2.86929  | 3.02470  |

PES43 3.7570 -0.4121 -1.6422 6.0558 -11.86270 -10.83672  
PES47 1.9263 -8.4653 0.7299 3.2262 1.78166 -0.56849  
PES48 -8.3978 -3.6317 3.5739 -3.0306 -3.31781 0.67045  
PES49 5.8685 -6.9895 -0.5386 5.5678 1.72984 2.41472  
PES50 1.3569 -8.5337 0.6575 2.9057 2.49661 -1.81267  
PES52 -1.6318 0.7390 0.4319 -0.7249 -0.53815 2.57969  
PES53 -2.5479 1.8433 -10.1486 -3.0866 6.50475 2.17745  
PES54 -2.7399 -4.2008 1.8805 0.1025 -3.96778 6.71029  
PES55 -1.7059 3.2125 -11.6552 -2.6110 6.03782 0.77682  
PES56 -2.7740 -3.9787 -5.9475 -1.5249 5.23123 -0.46331  
PES59 7.7658 0.2901 2.9724 -6.7364 1.25232 -1.71041  
PES60 6.3085 3.9234 4.4715 -9.9747 -0.62126 -0.78624  
PES61 7.0495 2.9355 3.9362 -8.5098 0.05099 -1.14555  
PES63 6.6609 -6.0380 -0.4312 3.9330 2.84985 -0.09898  
PES64 0.6546 4.2428 -1.3518 2.9063 -9.02974 15.91727  
PES65 -0.7583 5.8236 -10.2107 0.7278 -9.31328 -7.10397
